# Supplementary material for: Nitrogen doped graphene paper as a highly conductive, and light-weight substrate for flexible supercapacitors
Source: Royal Society of Chemistry journal article supplement (doi:10.1039/c4ra11024b), 2014-01-01
Supplement: c4ra11024b1.pdf [file c4ra11024b1.pdf]

# **Nitrogen Doped Graphene Paper as Highly Conductive, and Light-weight Substrate for Flexible Supercapacitors**

*Cheng Li, Yue Hu, Minghao Yu, Zifan Wang, Wenxia Zhao, Peng Liu,\* Yexiang Tong  
and Xihong Lu\**

*MOE of the Key Laboratory of Bioinorganic and Synthetic Chemistry, KLGHEI of  
Environment and Energy Chemistry, School of Chemistry and Chemical Engineering,  
Sun Yat-Sen University, Guangzhou 510275, People's Republic of China.*

*Email: [luxh6@mail.sysu.edu.cn](mailto:luxh6@mail.sysu.edu.cn) (X. H. Lu); [ceslp@mail.sysu.edu.cn](mailto:ceslp@mail.sysu.edu.cn) (P. Liu).*

*Tel: (+86)20 84110071 Fax: (+86)20 84112245*

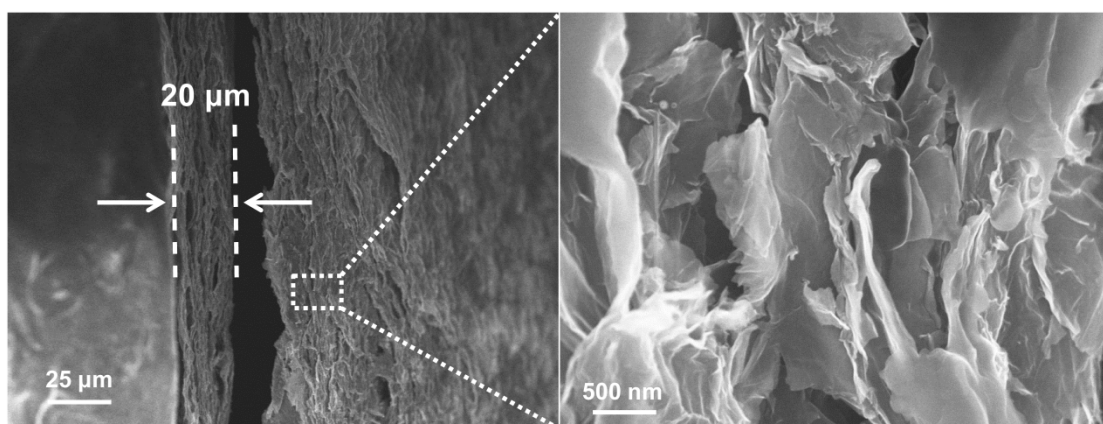

**Fig. S1.** (a) Low and (b) high-resolution side-view SEM images of N-RGO paper.

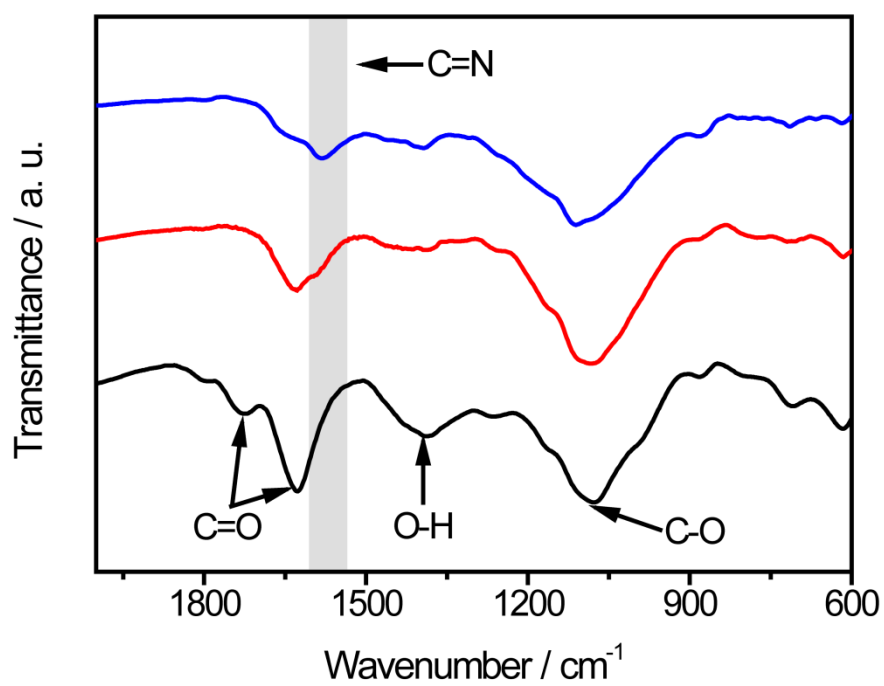

**Fig. S2.** FTIR spectra of GO, RGO, N-RGO paper.

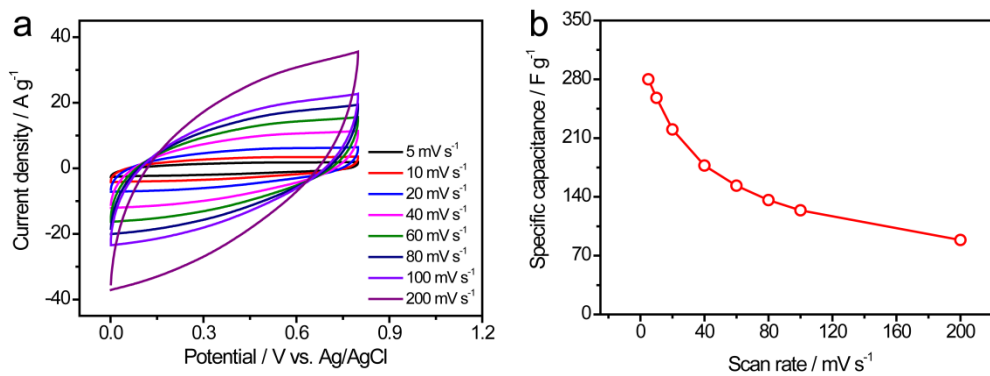

**Fig. S3.** (a) CV curves of N-RGO electrode collected at various scan rate. (b) Specific capacitance calculated for N-RGO electrode based on (b) as a function of the scan rate.
